# Supplementary figures and images for: Synthesis of maleimide-braced peptide macrocycles and their potential anti-SARS-CoV-2 mechanisms
Source: Royal Society of Chemistry journal article supplement (doi:10.1039/d2cc06371a), 2022-12-12

Fig. 3

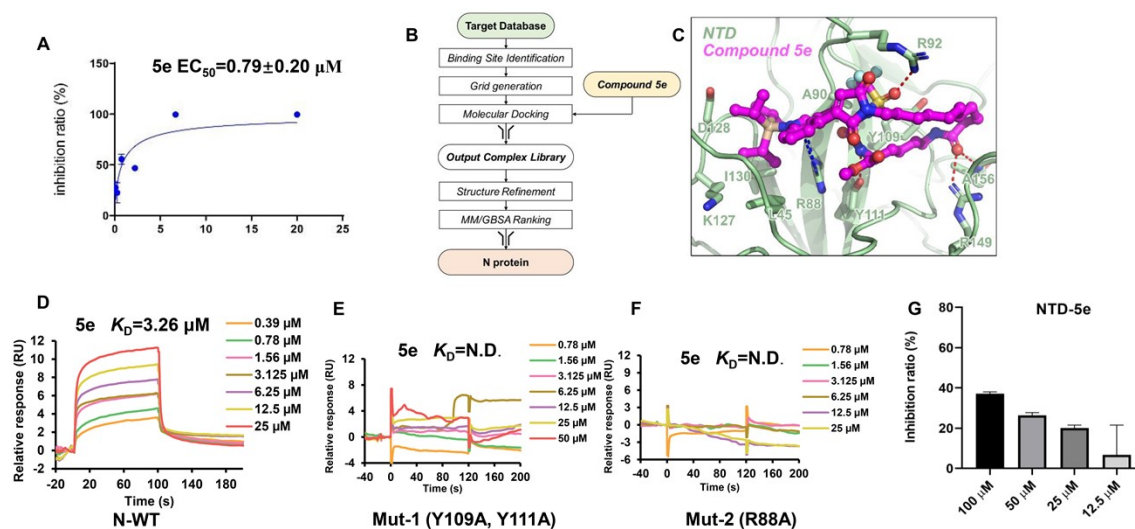

Fig. S1

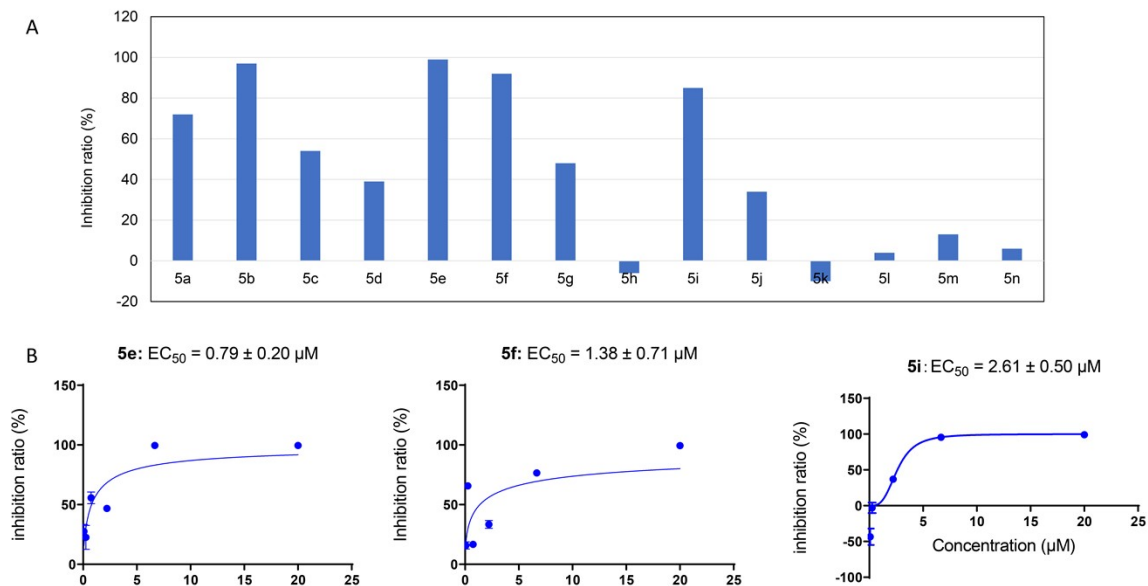

Fig. S2

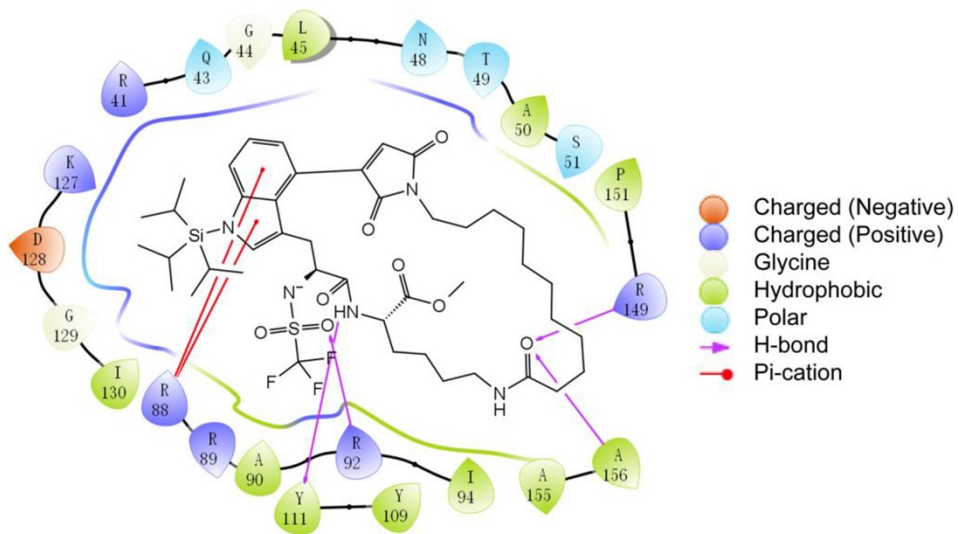

Fig. S3

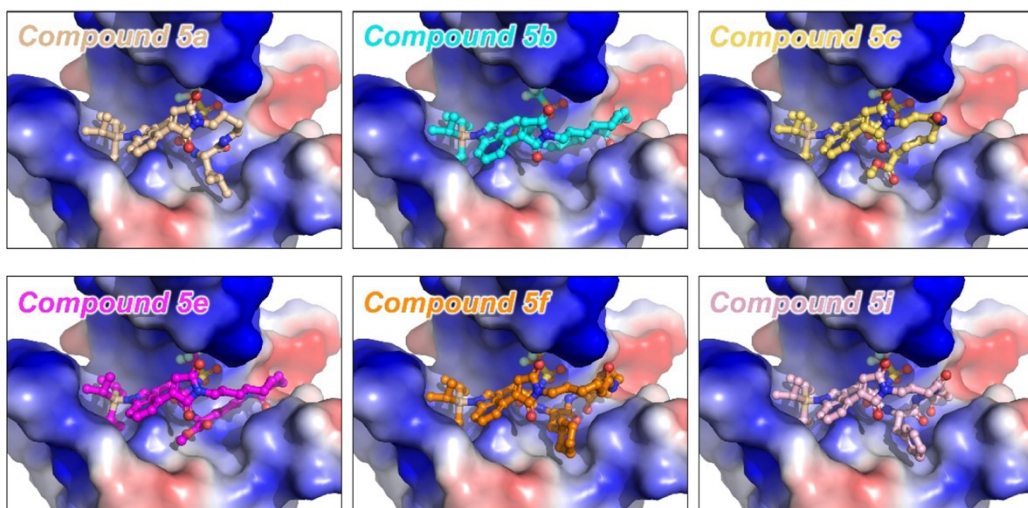

Fig. S4

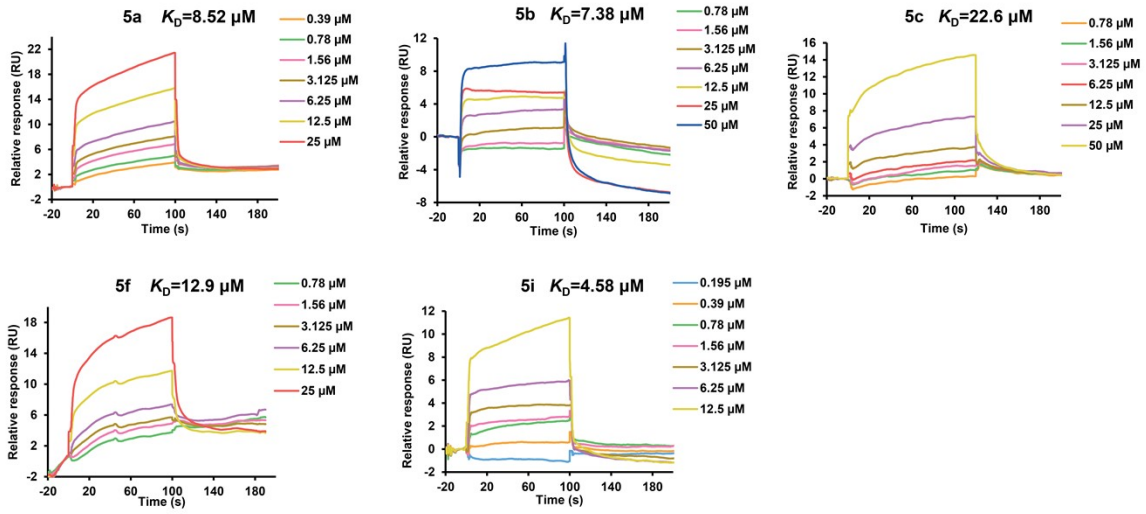

Fig. S5

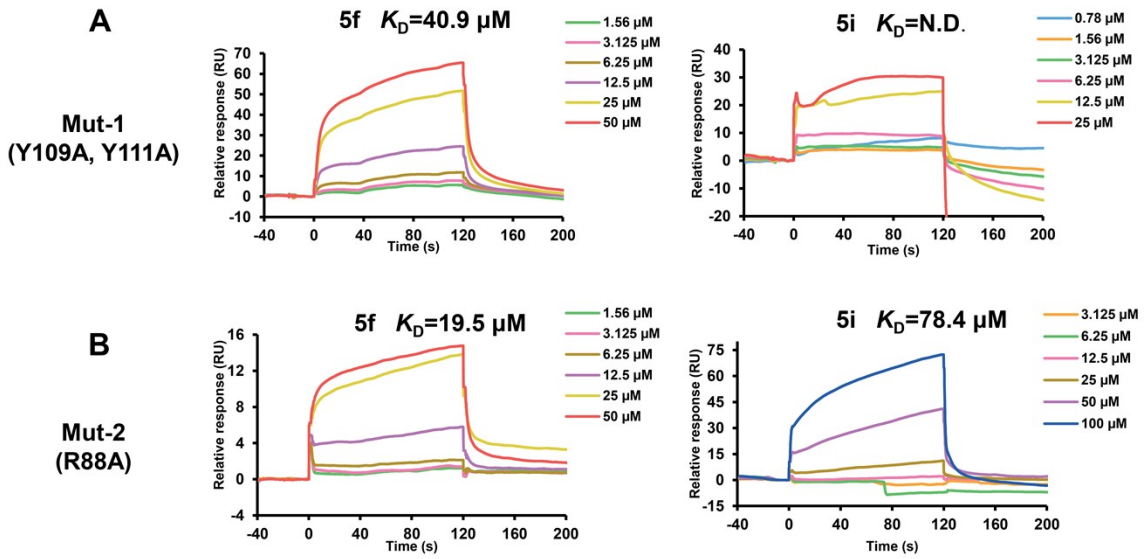

Supplement: d2cc06371a1.pdf [file d2cc06371a1.pdf]
